# Supplementary material
Source: Royal Society of Chemistry journal article supplement (doi:10.1039/d6an00190d)
Supplement: d6an00190d1.pdf [file d6an00190d1.pdf]

**Supplemental Information:** *Effect of O-acetylation on ketene and carbonyl yields from conventional and emerging cannabinoids*

Rhianna L. Evans<sup>a</sup>, C. Noel Corley<sup>a</sup>, Haylee C. Hunsaker<sup>a</sup>, Sascha C. T. Nicklisch<sup>a</sup>, Allison K. Ehrlich<sup>a</sup> and Tran B. Nguyen<sup>\*a</sup>

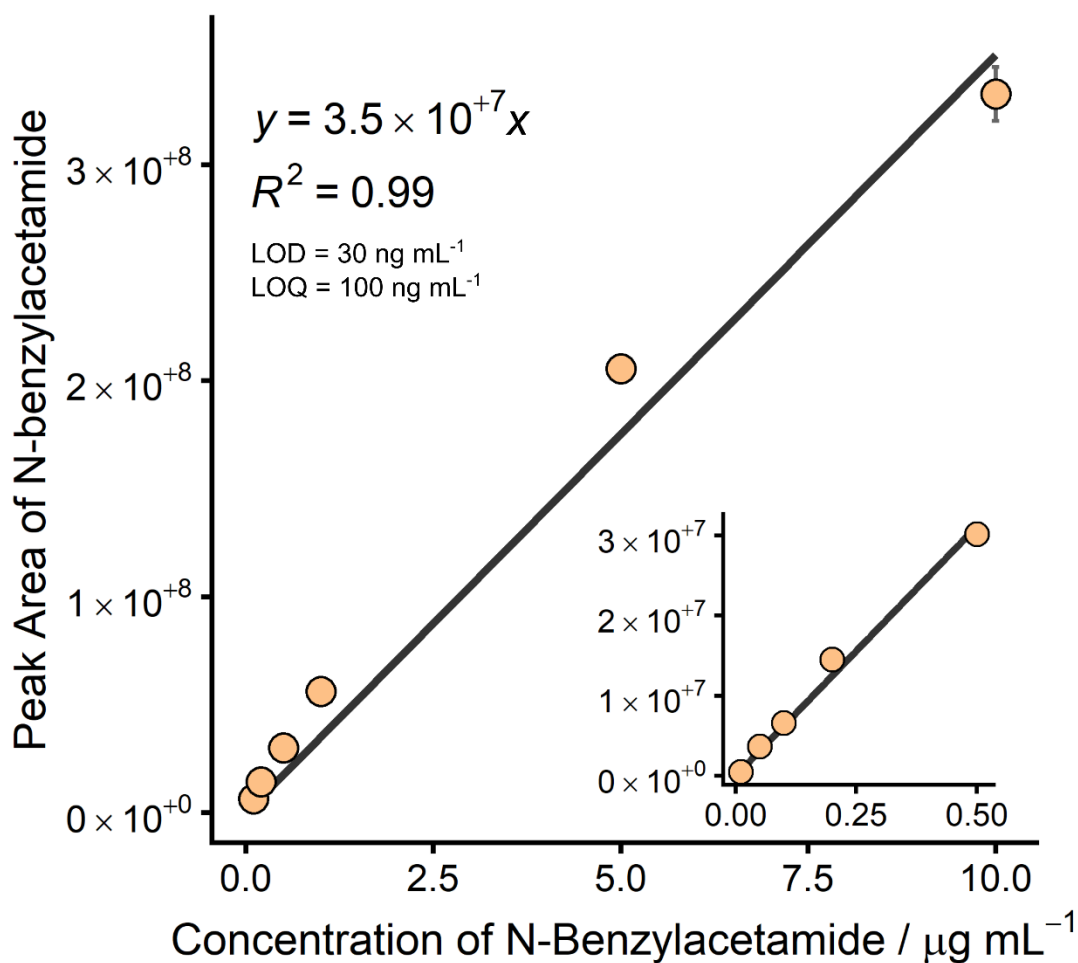

**Figure S1:** HPLC-HRMS calibration curve of N-benzylacetamide used to determine ketene concentration in the vaping samples. An inset plot of the low concentration calibration is shown in the lower right panel. The linearity, limit of detection and limit of quantification are shown in the top left.

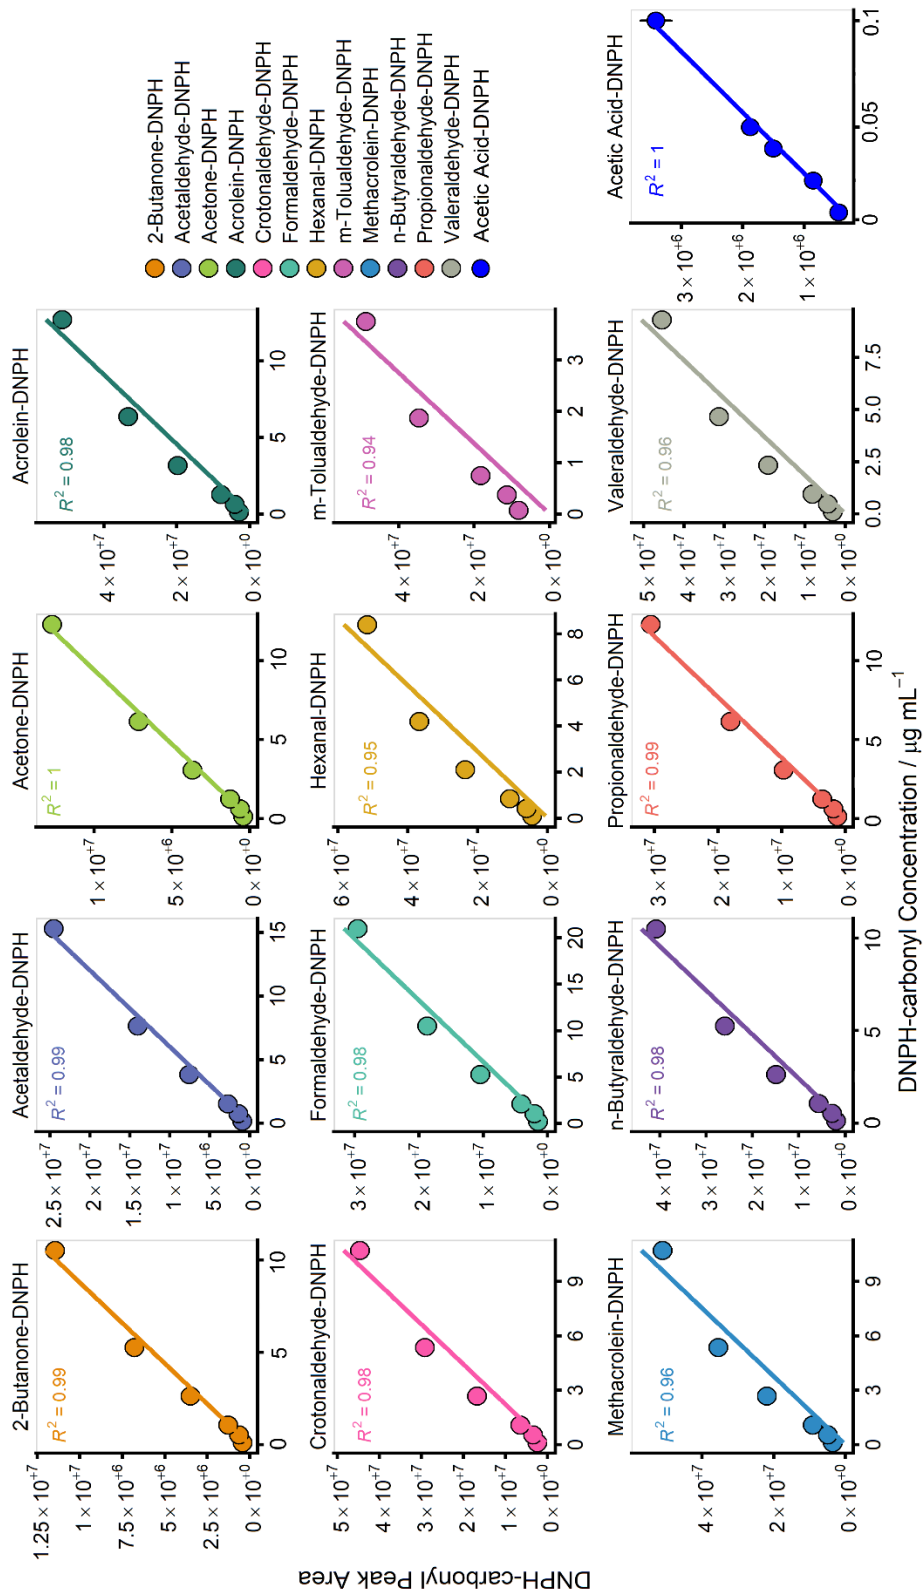

**Figure S2:** HPLC-HRMS calibration curve for each DNPH hydrazone derivative of the vaping carbonyls quantified in this study. The linearity of each curve is shown in the top left.

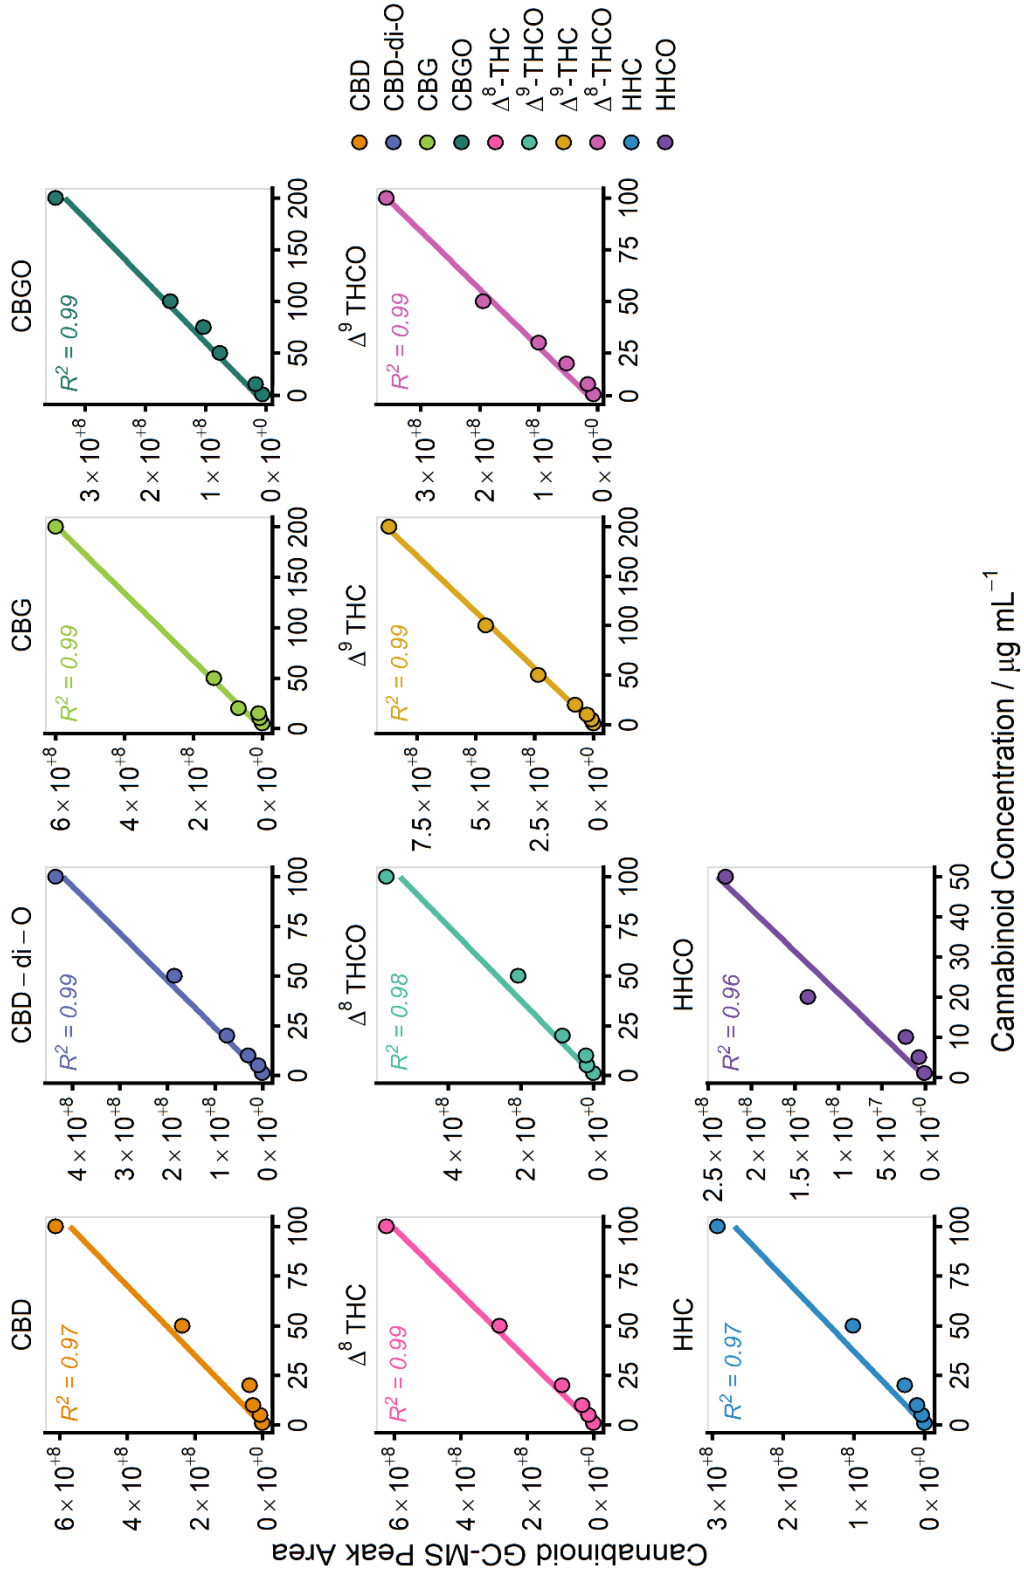

**Figure S3:** GC-MS calibration curves of each tested cannabinoid and the O-Acetate analogue. The linearity of each curve is shown in the top left.

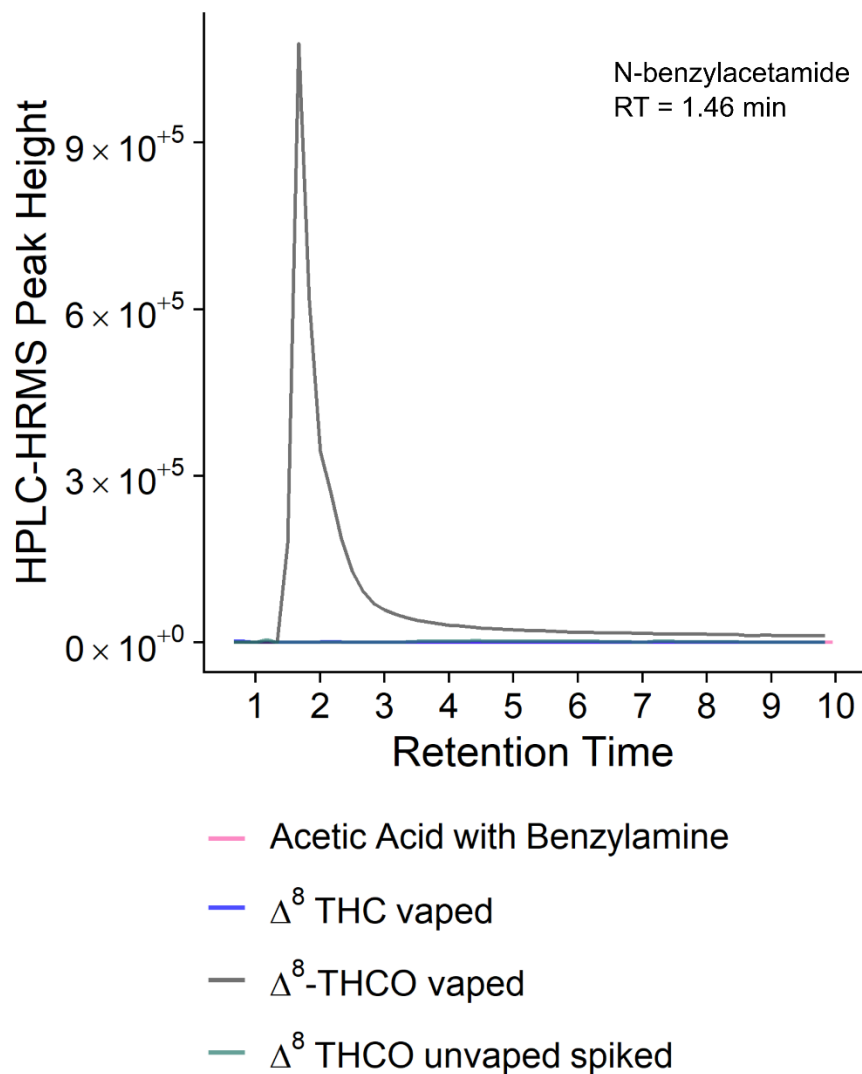

**Figure S4:** Extracted ion chromatograms for the N-Benzylacetamide peak detected by HPLC-HRMS for the vaped  $\Delta^8$ -THCO experiment (grey), control data from vaping  $\Delta^8$ -THC (blue), spiking the unvaped  $\Delta^8$ -THCO distillate with trapping reagent benzylamine (green) and a control reaction of acetic acid with benzylamine (pink)

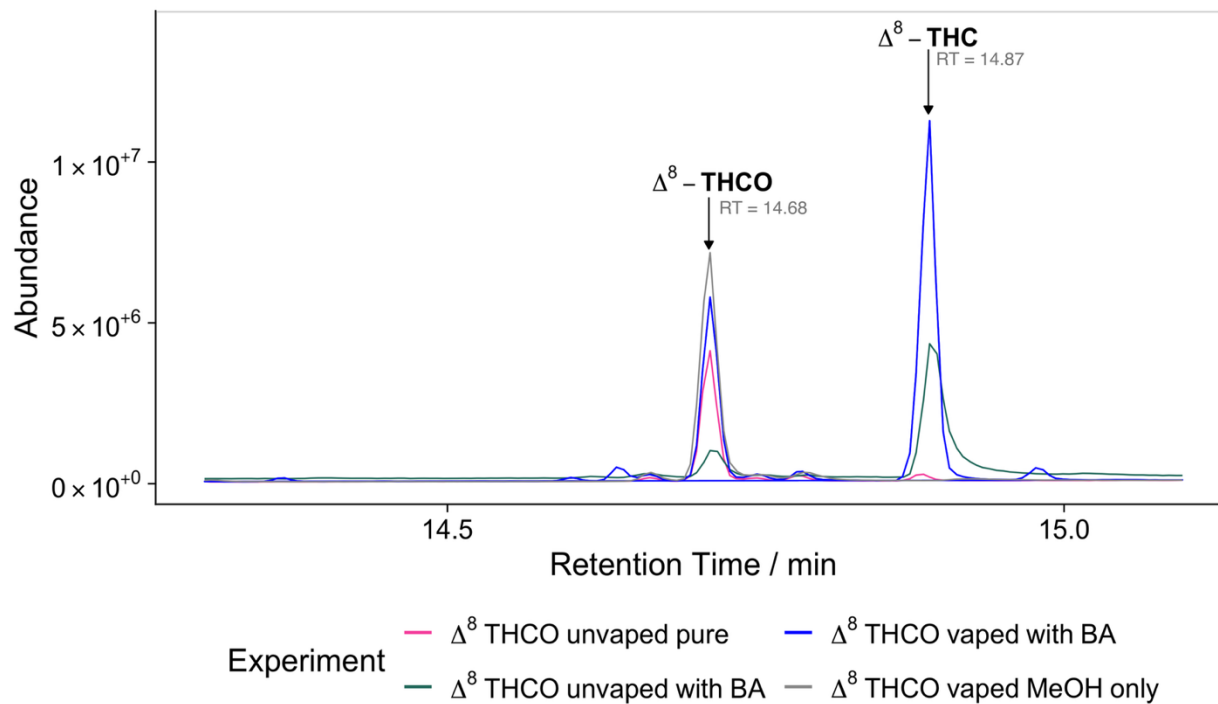

**Figure S5:** GC-MS chromatograms of  $\Delta^8$ -THCO distillate unvaped diluted in methanol (pink), in the vaping experiments with benzylamine (BA) trapping reagent (blue), in a control experiment of unvaped distillate spiked with benzylamine (BA) reagent (green) and in a vaping experiment without benzylamine (grey).

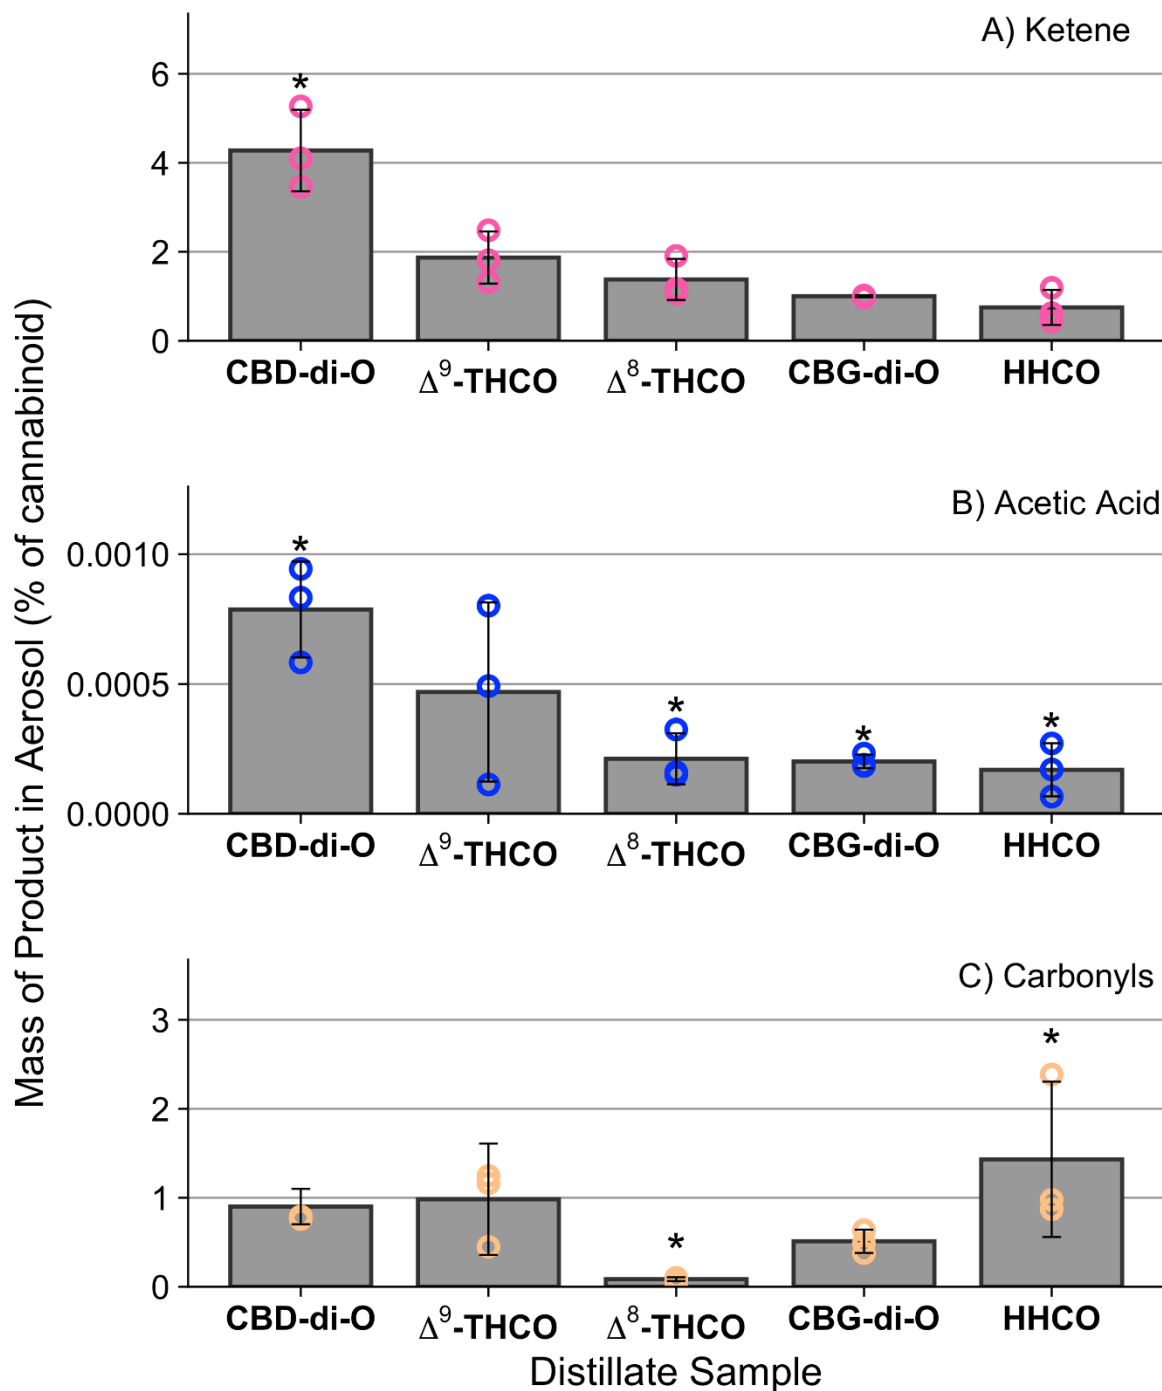

**Figure S6:** Product yields of A) ketene, B) acetic acid, and C) carbonyls by cannabinoid mass for the cannabinoid O-acetate distillates upon vaping. The axis labels are ordered by descending yield. The black asterisks indicate statistically significant differences determined by a one way ANOVA test. For A) CBD-di-O is statistically significant from all other distillates. For B) CBD-di-O is statistically significant from all other distillates except d9-THCO. For C) CBG-di-O and d8-THCO are statistically significant from CBD-di-O.

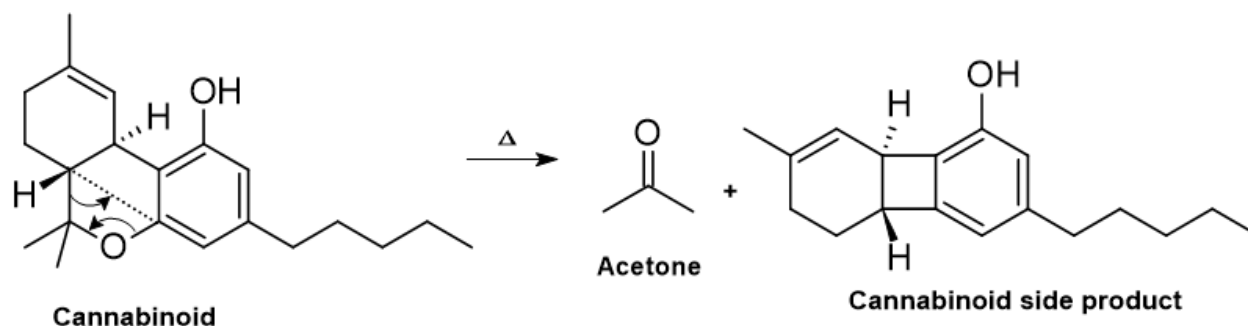

**Scheme S1:** A proposed direct thermal degradation pathway toward formation of the dominant carbonyl, acetone, from vaping cannabinoids and their O-acetate derivatives via the dimethyl carbon that is present in numerous of the tested cannabinoids. In the O-acetate analogues the phenyl moiety will have a O-C(O)CH<sub>3</sub> group in place of OH in the above scheme. Robertson et al.<sup>1</sup> proposed formation of acetone and other carbonyls via radical oxidation initiated pathways. Additional investigations are needed to confirm which pathway(s) are operative during vaping.

**Table S1:** Tabulated data for ketene concentration, standard deviation (S.D.), total cannabinoid found in 15 puffs, and the percentage mass of ketene normalized by cannabinoids. These determinations are performed in triplicate. The ketene data are not reported for non-acetylated cannabinoid vaped aerosol because they were all below detection limit.

| Distillate vaped          | Normalised ketene (µg/mg) | S.D. ketene (µg/mg) | Total mass cannabinoid (mg) | Percent mass of ketene (%) |
|---------------------------|---------------------------|---------------------|-----------------------------|----------------------------|
| <b>CBD-di-O</b>           | 42.75                     | 9.16                | 2.03                        | 4.28                       |
| <b>CBG-di-O</b>           | 10.02                     | 0.23                | 13.60                       | 1.00                       |
| <b>HHCO</b>               | 7.51                      | 3.93                | 14.61                       | 0.75                       |
| <b>Δ<sup>8</sup>-THCO</b> | 13.80                     | 4.60                | 7.36                        | 1.38                       |
| <b>Δ<sup>9</sup>-THCO</b> | 18.72                     | 5.85                | 9.20                        | 1.87                       |

**Table S2:** Tabulated data for carbonyl concentration from O-acetylated cannabinoids, including carbonyl production yields, standard deviation (S.D.), and the percentage mass of carbonyl normalized by cannabinoids. These determinations were performed in triplicate. Total cannabinoid mass for the O-acetylated cannabinoids are reported in Table S1. Only carbonyls for which there are detectable signals from any of the vape samples are reported. ND = not detected.

| <b>Distillate vaped</b> | <b>Compound detected</b> | <b>Carbonyl production (µg/ mg)</b> | <b>S.D. Carbonyl production (µg/ mg)</b> | <b>Percent mass of carbonyl (%)</b> |
|-------------------------|--------------------------|-------------------------------------|------------------------------------------|-------------------------------------|
| CBD-di-O                | 2-Butanone-DNPH          | 0.786                               | 0.000                                    | 0.079                               |
| CBG-di-O                | 2-Butanone-DNPH          | 0.203                               | 0.032                                    | 0.020                               |
| Δ <sup>8</sup> -THCO    | 2-Butanone-DNPH          | 0.082                               | 0.018                                    | 0.008                               |
| Δ <sup>9</sup> -THCO    | 2-Butanone-DNPH          | 0.289                               | 0.288                                    | 0.029                               |
| HHCO                    | 2-Butanone-DNPH          | 0.070                               | 0.000                                    | 0.007                               |
| CBD-di-O                | Acetaldehyde-DNPH        | 0.319                               | 0.000                                    | 0.032                               |
| CBG-di-O                | Acetaldehyde-DNPH        | 0.119                               | 0.023                                    | 0.012                               |
| Δ <sup>8</sup> -THCO    | Acetaldehyde-DNPH        | 0.027                               | 0.000                                    | 0.003                               |
| Δ <sup>9</sup> -THCO    | Acetaldehyde-DNPH        | 0.319                               | 0.135                                    | 0.032                               |
| HHCO                    | Acetaldehyde-DNPH        | 0.076                               | 0.000                                    | 0.008                               |
| CBD-di-O                | Acetic Acid-DNPH         | 0.008                               | 0.002                                    | 0.001                               |
| CBG-di-O                | Acetic Acid-DNPH         | 0.002                               | 0.000                                    | 0.000                               |
| Δ <sup>8</sup> -THCO    | Acetic Acid-DNPH         | 0.002                               | 0.001                                    | 0.000                               |
| Δ <sup>9</sup> -THCO    | Acetic Acid-DNPH         | 0.005                               | 0.003                                    | 0.000                               |
| HHCO                    | Acetic Acid-DNPH         | 0.002                               | 0.001                                    | 0.000                               |
| CBD-di-O                | Acetone-DNPH             | 6.493                               | 1.981                                    | 0.649                               |
| CBG-di-O                | Acetone-DNPH             | 4.469                               | 1.130                                    | 0.447                               |
| Δ <sup>8</sup> -THCO    | Acetone-DNPH             | 0.673                               | 0.144                                    | 0.067                               |
| Δ <sup>9</sup> -THCO    | Acetone-DNPH             | 7.874                               | 4.811                                    | 0.787                               |
| HHCO                    | Acetone-DNPH             | 13.937                              | 8.602                                    | 1.394                               |
| CBD-di-O                | Formaldehyde-DNPH        | 0.082                               | 0.000                                    | 0.008                               |
| CBG-di-O                | Formaldehyde-DNPH        | ND                                  | ND                                       | ND                                  |
| Δ <sup>8</sup> -THCO    | Formaldehyde-DNPH        | ND                                  | ND                                       | ND                                  |
| Δ <sup>9</sup> -THCO    | Formaldehyde-DNPH        | 0.040                               | 0.025                                    | 0.004                               |
| HHCO                    | Formaldehyde-DNPH        | 0.031                               | 0.005                                    | 0.003                               |
| CBD-di-O                | Hexanal-DNPH             | ND                                  | ND                                       | ND                                  |
| CBG-di-O                | Hexanal-DNPH             | ND                                  | ND                                       | ND                                  |
| Δ <sup>8</sup> -THCO    | Hexanal-DNPH             | ND                                  | ND                                       | ND                                  |
| Δ <sup>9</sup> -THCO    | Hexanal-DNPH             | 0.340                               | 0.315                                    | 0.034                               |
| HHCO                    | Hexanal-DNPH             | 0.052                               | 0.000                                    | 0.005                               |
| CBD-di-O                | Methacrolein-DNPH        | ND                                  | ND                                       | ND                                  |
| CBG-di-O                | Methacrolein-DNPH        | 0.014                               | 0.006                                    | 0.001                               |
| Δ <sup>8</sup> -THCO    | Methacrolein-DNPH        | ND                                  | ND                                       | ND                                  |
| Δ <sup>9</sup> -THCO    | Methacrolein-DNPH        | ND                                  | ND                                       | ND                                  |
| HHCO                    | Methacrolein-DNPH        | ND                                  | ND                                       | ND                                  |

|                  |                      |       |       |       |
|------------------|----------------------|-------|-------|-------|
| CBD-di-O         | Propionaldehyde-DNPH | 0.551 | 0.000 | 0.055 |
| CBG-di-O         | Propionaldehyde-DNPH | 0.161 | 0.020 | 0.016 |
| $\Delta^8$ -THCO | Propionaldehyde-DNPH | 0.032 | 0.000 | 0.003 |
| $\Delta^9$ -THCO | Propionaldehyde-DNPH | 0.441 | 0.257 | 0.044 |
| HHCO             | Propionaldehyde-DNPH | ND    | ND    | ND    |
| CBD-di-O         | Valeraldehyde-DNPH   | 0.198 | 0.000 | 0.020 |
| CBG-di-O         | Valeraldehyde-DNPH   | 0.054 | 0.037 | 0.005 |
| $\Delta^8$ -THCO | Valeraldehyde-DNPH   | ND    | ND    | ND    |
| $\Delta^9$ -THCO | Valeraldehyde-DNPH   | 0.132 | 0.039 | 0.013 |
| HHCO             | Valeraldehyde-DNPH   | 0.049 | ND    | 0.005 |
| CBD-di-O         | m-Tolualdehyde-DNPH  | ND    | ND    | ND    |
| CBG-di-O         | m-Tolualdehyde-DNPH  | ND    | ND    | ND    |
| $\Delta^8$ -THCO | m-Tolualdehyde-DNPH  | 0.008 | 0.000 | 0.001 |
| $\Delta^9$ -THCO | m-Tolualdehyde-DNPH  | ND    | ND    | ND    |
| HHCO             | m-Tolualdehyde-DNPH  | ND    | ND    | ND    |
| CBD-di-O         | n-Butyraldehyde-DNPH | 0.584 | 0.000 | 0.058 |
| CBG-di-O         | n-Butyraldehyde-DNPH | 0.093 | 0.060 | 0.009 |
| $\Delta^8$ -THCO | n-Butyraldehyde-DNPH | 0.043 | 0.042 | 0.004 |
| $\Delta^9$ -THCO | n-Butyraldehyde-DNPH | 0.398 | 0.380 | 0.040 |
| HHCO             | n-Butyraldehyde-DNPH | 0.105 | 0.119 | 0.011 |

**Table S3:** Tabulated data for carbonyl concentration from non-acetylated cannabinoids, including total cannabinoid mass in 15 puffs, carbonyl production yields, and the percentage mass of carbonyl normalized by cannabinoids. These determinations were performed in a single replicate. Only carbonyls for which there are detectable signals from any of the vape samples are reported. ND = not detected.

| <b>Distillate vaped</b> | <b>Compound detected</b> | <b>Total mass cannabinoid (mg)</b> | <b>Carbonyl production (<math>\mu\text{g}/\text{mg}</math>)</b> | <b>Percent mass of carbonyl (%)</b> |
|-------------------------|--------------------------|------------------------------------|-----------------------------------------------------------------|-------------------------------------|
| CBD                     | Acetic Acid-DNPH         | 0.68                               | 0.02                                                            | 0.002                               |
| CBG                     | Acetic Acid-DNPH         | 11.96                              | 0.00                                                            | 0.000                               |
| $\Delta^8$ -THC         | Acetic Acid-DNPH         | 0.16                               | 0.08                                                            | 0.008                               |
| $\Delta^9$ -THC         | Acetic Acid-DNPH         | 0.18                               | 0.05                                                            | 0.005                               |
| HHC                     | Acetic Acid-DNPH         | 0.55                               | 0.02                                                            | 0.002                               |
| CBD                     | Acetaldehyde-DNPH        | 0.68                               | ND                                                              | ND                                  |
| CBG                     | Acetaldehyde-DNPH        | 11.96                              | 0.02                                                            | 0.002                               |
| $\Delta^8$ -THC         | Acetaldehyde-DNPH        | 0.16                               | 1.35                                                            | 0.135                               |
| $\Delta^9$ -THC         | Acetaldehyde-DNPH        | 0.18                               | ND                                                              | ND                                  |
| HHC                     | Acetaldehyde-DNPH        | 0.55                               | ND                                                              | ND                                  |
| CBD                     | Acetone-DNPH             | 0.68                               | 17.34                                                           | 1.734                               |
| CBG                     | Acetone-DNPH             | 11.96                              | 0.83                                                            | 0.083                               |
| $\Delta^8$ -THC         | Acetone-DNPH             | 0.16                               | 65.07                                                           | 6.507                               |
| $\Delta^9$ -THC         | Acetone-DNPH             | 0.18                               | 57.60                                                           | 5.760                               |
| HHC                     | Acetone-DNPH             | 0.55                               | 11.54                                                           | 1.154                               |
| CBD                     | 2-Butanone-DNPH          | 0.68                               | 0.81                                                            | 0.081                               |
| CBG                     | 2-Butanone-DNPH          | 11.96                              | 0.06                                                            | 0.006                               |
| $\Delta^8$ -THC         | 2-Butanone-DNPH          | 0.16                               | 3.26                                                            | 0.326                               |
| $\Delta^9$ -THC         | 2-Butanone-DNPH          | 0.18                               | 3.51                                                            | 0.351                               |
| HHC                     | 2-Butanone-DNPH          | 0.55                               | ND                                                              | ND                                  |
| CBD                     | n-Butyraldehyde-DNPH     | 0.68                               | ND                                                              | ND                                  |
| CBG                     | n-Butyraldehyde-DNPH     | 11.96                              | 0.01                                                            | 0.001                               |
| $\Delta^8$ -THC         | n-Butyraldehyde-DNPH     | 0.16                               | 0.84                                                            | 0.084                               |
| $\Delta^9$ -THC         | n-Butyraldehyde-DNPH     | 0.18                               | ND                                                              | ND                                  |
| HHC                     | n-Butyraldehyde-DNPH     | 0.55                               | ND                                                              | ND                                  |
| CBD                     | Valeraldehyde-DNPH       | 0.68                               | ND                                                              | ND                                  |
| CBG                     | Valeraldehyde-DNPH       | 11.96                              | 0.16                                                            | 0.016                               |
| $\Delta^8$ -THC         | Valeraldehyde-DNPH       | 0.16                               | ND                                                              | ND                                  |
| $\Delta^9$ -THC         | Valeraldehyde-DNPH       | 0.18                               | ND                                                              | ND                                  |
| HHC                     | Valeraldehyde-DNPH       | 0.55                               | ND                                                              | ND                                  |
| CBD                     | m-Tolualdehyde-DNPH      | 0.68                               | 0.13                                                            | 0.013                               |
| CBG                     | m-Tolualdehyde-DNPH      | 11.96                              | 0.01                                                            | 0.001                               |
| $\Delta^8$ -THC         | m-Tolualdehyde-DNPH      | 0.16                               | 0.79                                                            | 0.079                               |
| $\Delta^9$ -THC         | m-Tolualdehyde-DNPH      | 0.18                               | 0.45                                                            | 0.045                               |
| HHC                     | m-Tolualdehyde-DNPH      | 0.55                               | 0.14                                                            | 0.014                               |

## References

1. Robertson NE, Connolly J, Shevchenko N, Mascal M, Pinkerton KE, Nicklisch SCT, Nguyen TB. Chemical Composition of Aerosols from the E-Cigarette Vaping of Natural and Synthetic Cannabinoids. *Chemical Research in Toxicology*. 2024;37(12):1965-75. doi: 10.1021/acs.chemrestox.4c00326.
